# Supplementary material
Source: PubMed Central journal article supplement (PMC9799158)

**Appendix S1 for:**

Pathogen surveillance and epidemiology in endangered Peninsular bighorn sheep (*Ovis canadensis nelsoni*)

Jessica N. Sanchez<sup>a</sup>, Brandon A. Munk<sup>b</sup>, Janene Colby<sup>c</sup>, Steve G. Torres<sup>b</sup>, Ben J. Gonzales<sup>b</sup>, James R. DeForge<sup>d</sup>, Aimee J. Byard<sup>d</sup>, Lora Konde<sup>b</sup>, Nicholas J. Shirkey<sup>b</sup>, Pranav S. Pandit<sup>a</sup>, Randy A. Botta<sup>c</sup>, Annette Roug<sup>e</sup>, Michael H. Ziccardi<sup>f</sup>, Christine K. Johnson<sup>a,\*</sup>

<sup>a</sup> EpiCenter for Disease Dynamics, One Health Institute, School of Veterinary Medicine, University of California at Davis, 1089 Veterinary Medicine Dr, Davis, California, USA 95616

<sup>b</sup> Wildlife Health Lab, California Department of Fish and Wildlife, 1701 Nimbus Rd, Rancho Cordova, CA, USA 95670

<sup>c</sup> California Department of Fish and Wildlife, South Coast Region, 3883 Ruffin Rd, San Diego, CA, USA 92123

<sup>d</sup> Bighorn Institute, P.O. Box 262, Palm Desert, CA, USA 92261

<sup>e</sup> Centre for Veterinary Wildlife Research, Department of Production Animal Medicine, Faculty of Veterinary Science, University of Pretoria, Soutpan Road, Onderstepoort, Pretoria 0110, South Africa

<sup>f</sup> Karen C. Drayer Wildlife Health Center, School of Veterinary Medicine, University of California at Davis, 1089 Veterinary Medicine Dr, Davis, California, USA 95616

\* Corresponding author: Christine K. Johnson

Address: EpiCenter for Disease Dynamics, One Health Institute, School of Veterinary Medicine, University of California at Davis, 1089 Veterinary Medicine Drive, Davis, CA, USA 95616

E-mail: ckjohnson@ucdavis.edu

Phone: (530) 752-7526

Appendix S1: Heatmaps of adult survival rates, lamb:ewe ratios, population size, temperature, precipitation, and pathogen prevalence (infection or exposure), by recovery region and year of sampling. The prevalence of each pathogen was calculated for each year-recovery region unit (i.e., “2010 – San Jacinto Mtns”) for which  $\geq 5$  samples were tested (all capture events included). Adult survival and pathogen prevalence are reported as proportions. Lamb:ewe ratios are reported as the number of lambs per adult female. Temperature was calculated as the average of daily maximum temperatures (Celsius) from June – September for year<sub>*t*</sub>. Annual precipitation (centimeters) for year<sub>*t*</sub> was measured as the sum of daily precipitation from November<sub>*t-1*</sub> through October<sub>*t*</sub>. Precipitation was also aggregated annually for winter (November<sub>*t-1*</sub> – April<sub>*t*</sub>) and summer (May<sub>*t*</sub> – October<sub>*t*</sub>) seasons. Numbers in each cell are the raw data values, while the color describes the relative value of each datapoint on a scale of 0-1. Gray cells indicate that samples were not tested, or population estimates were not calculated for that year and recovery region combination.



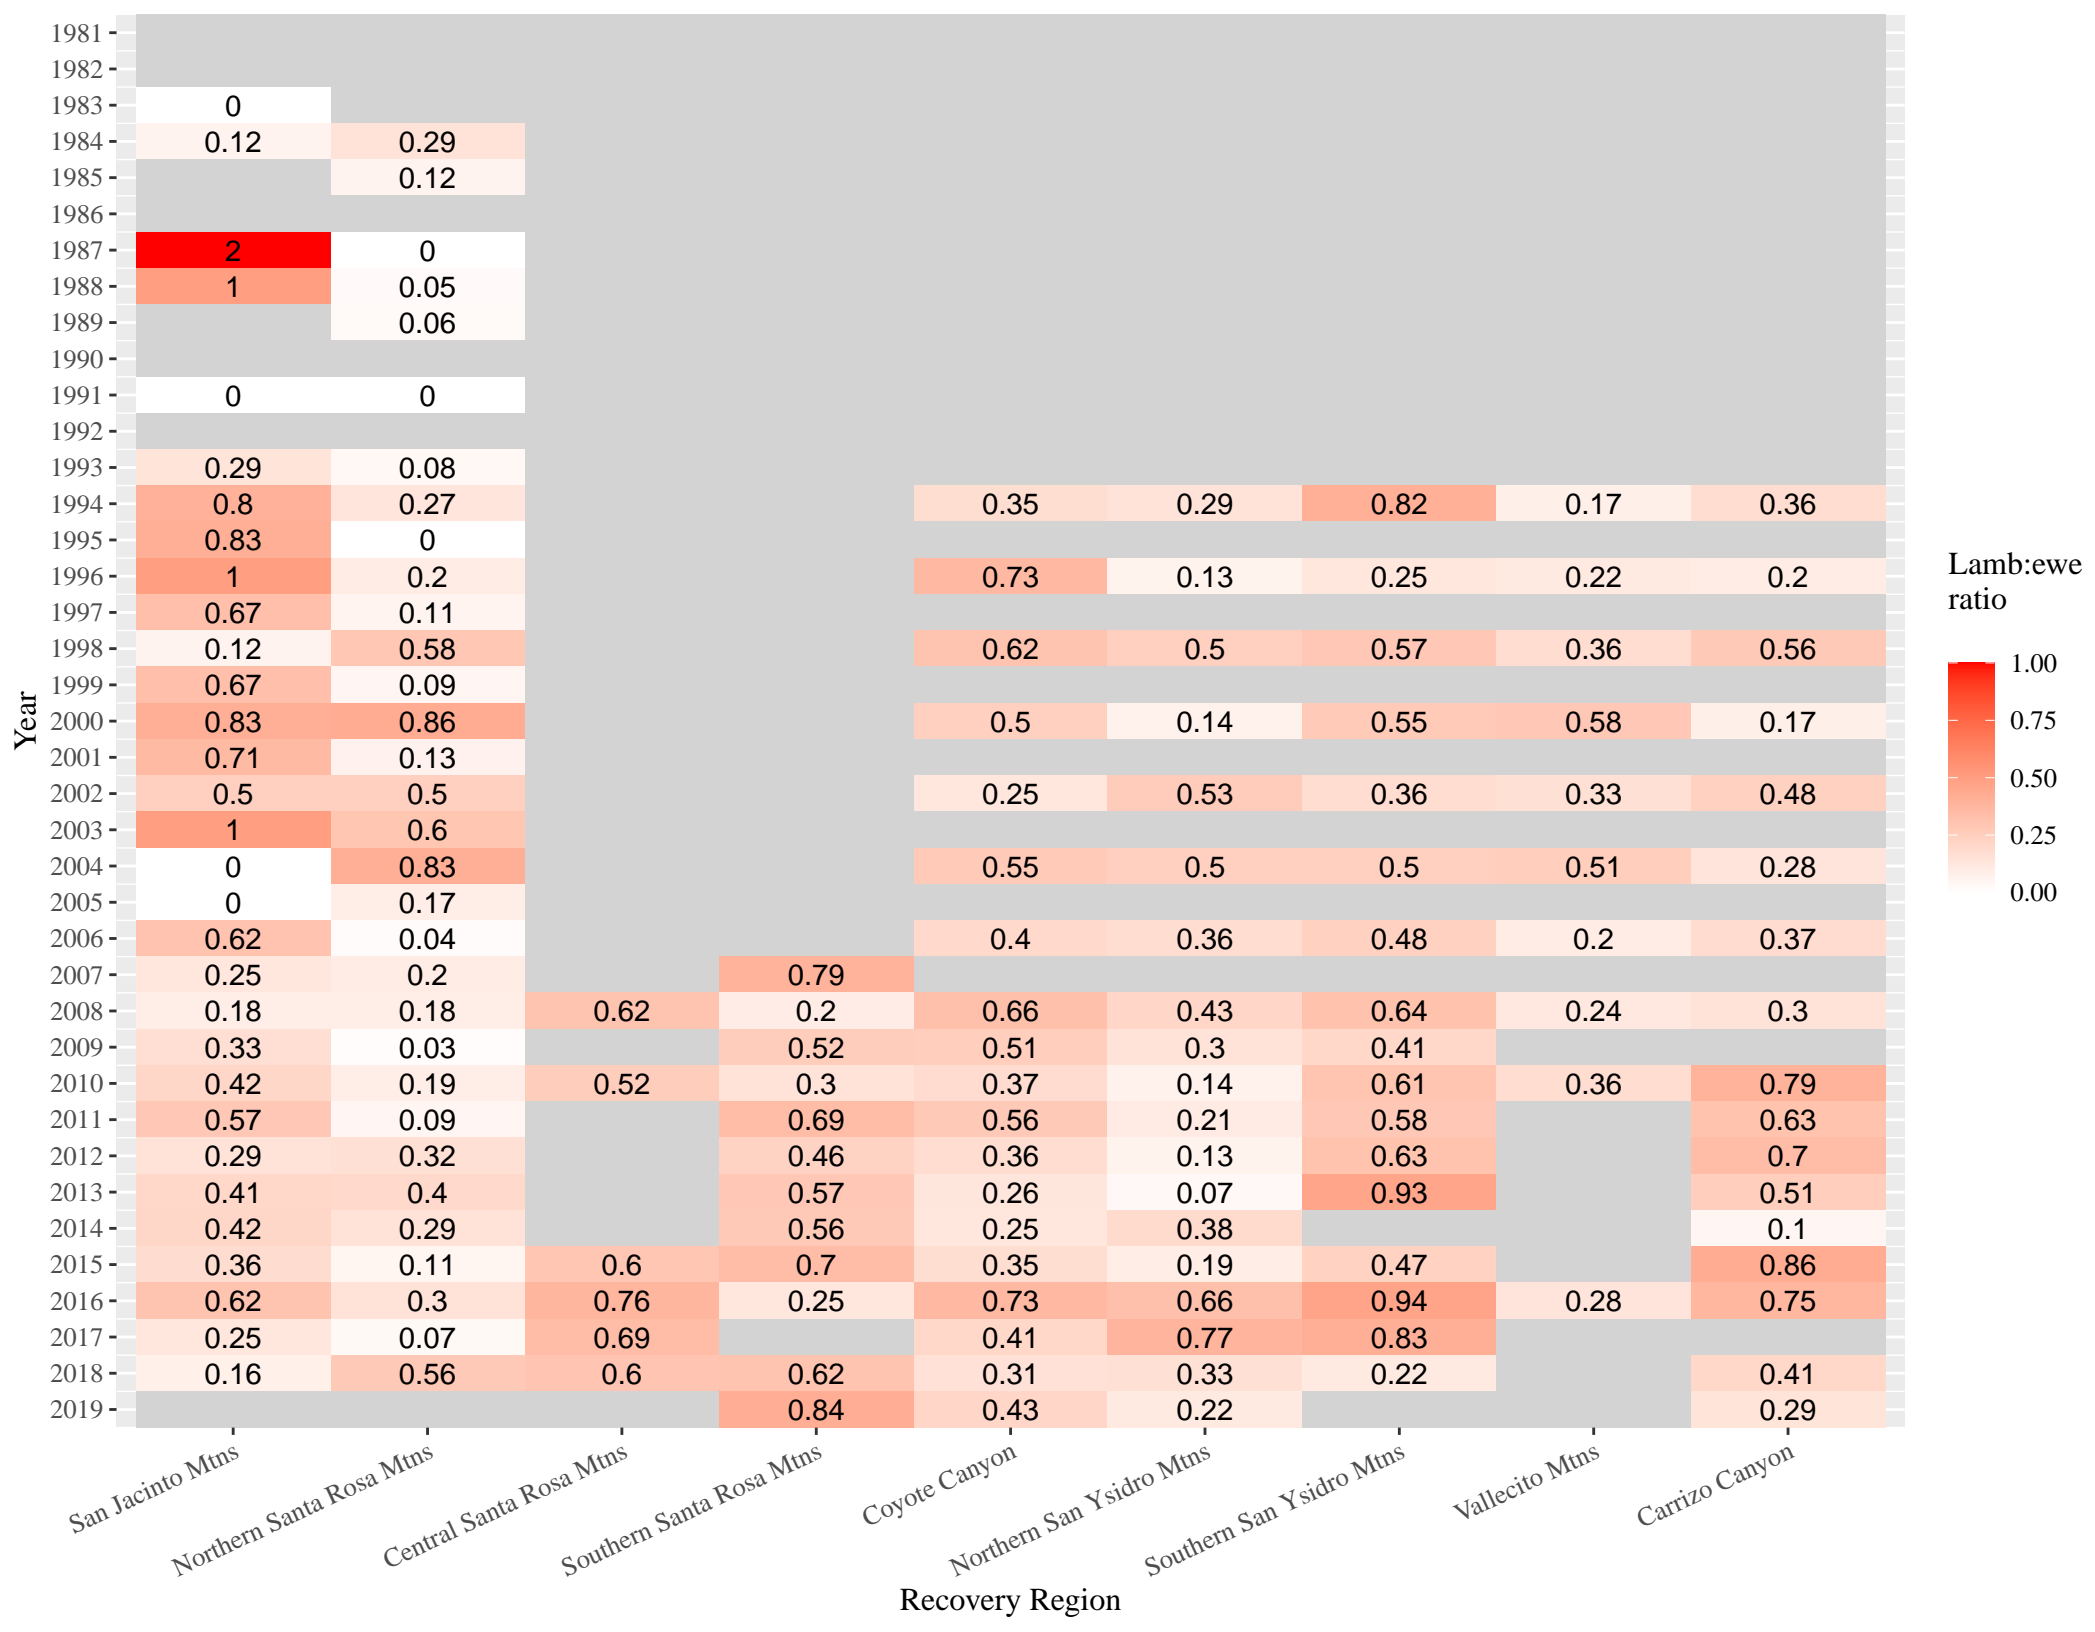

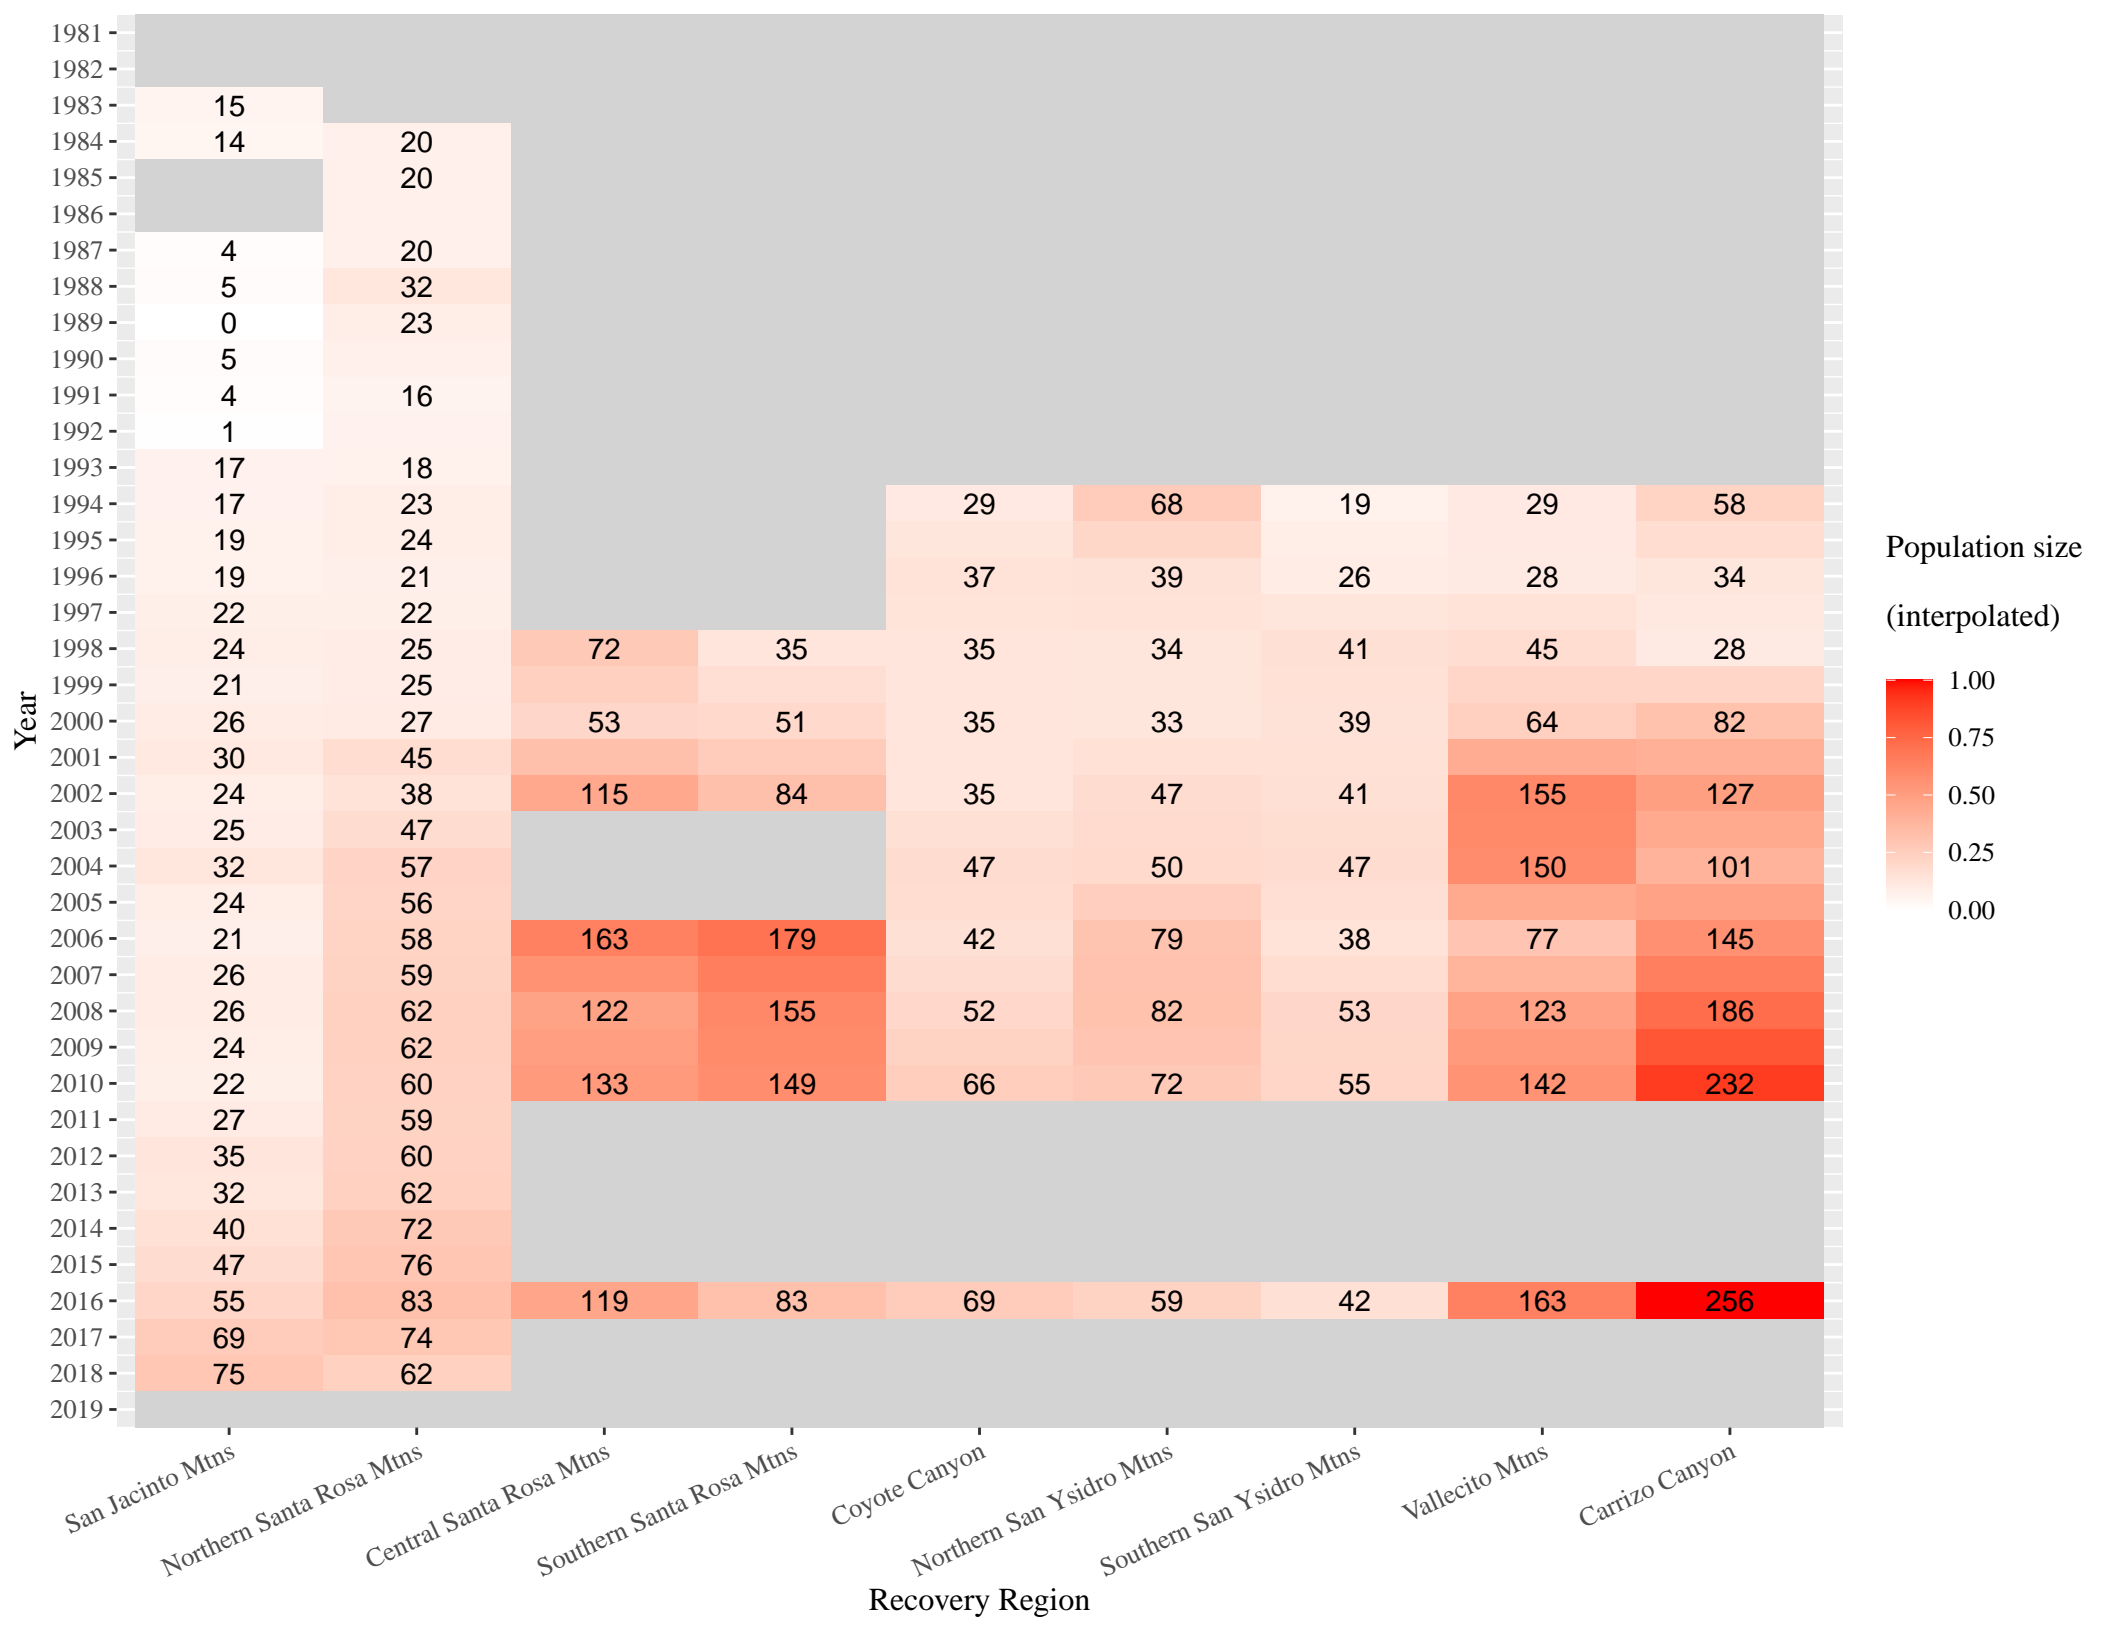

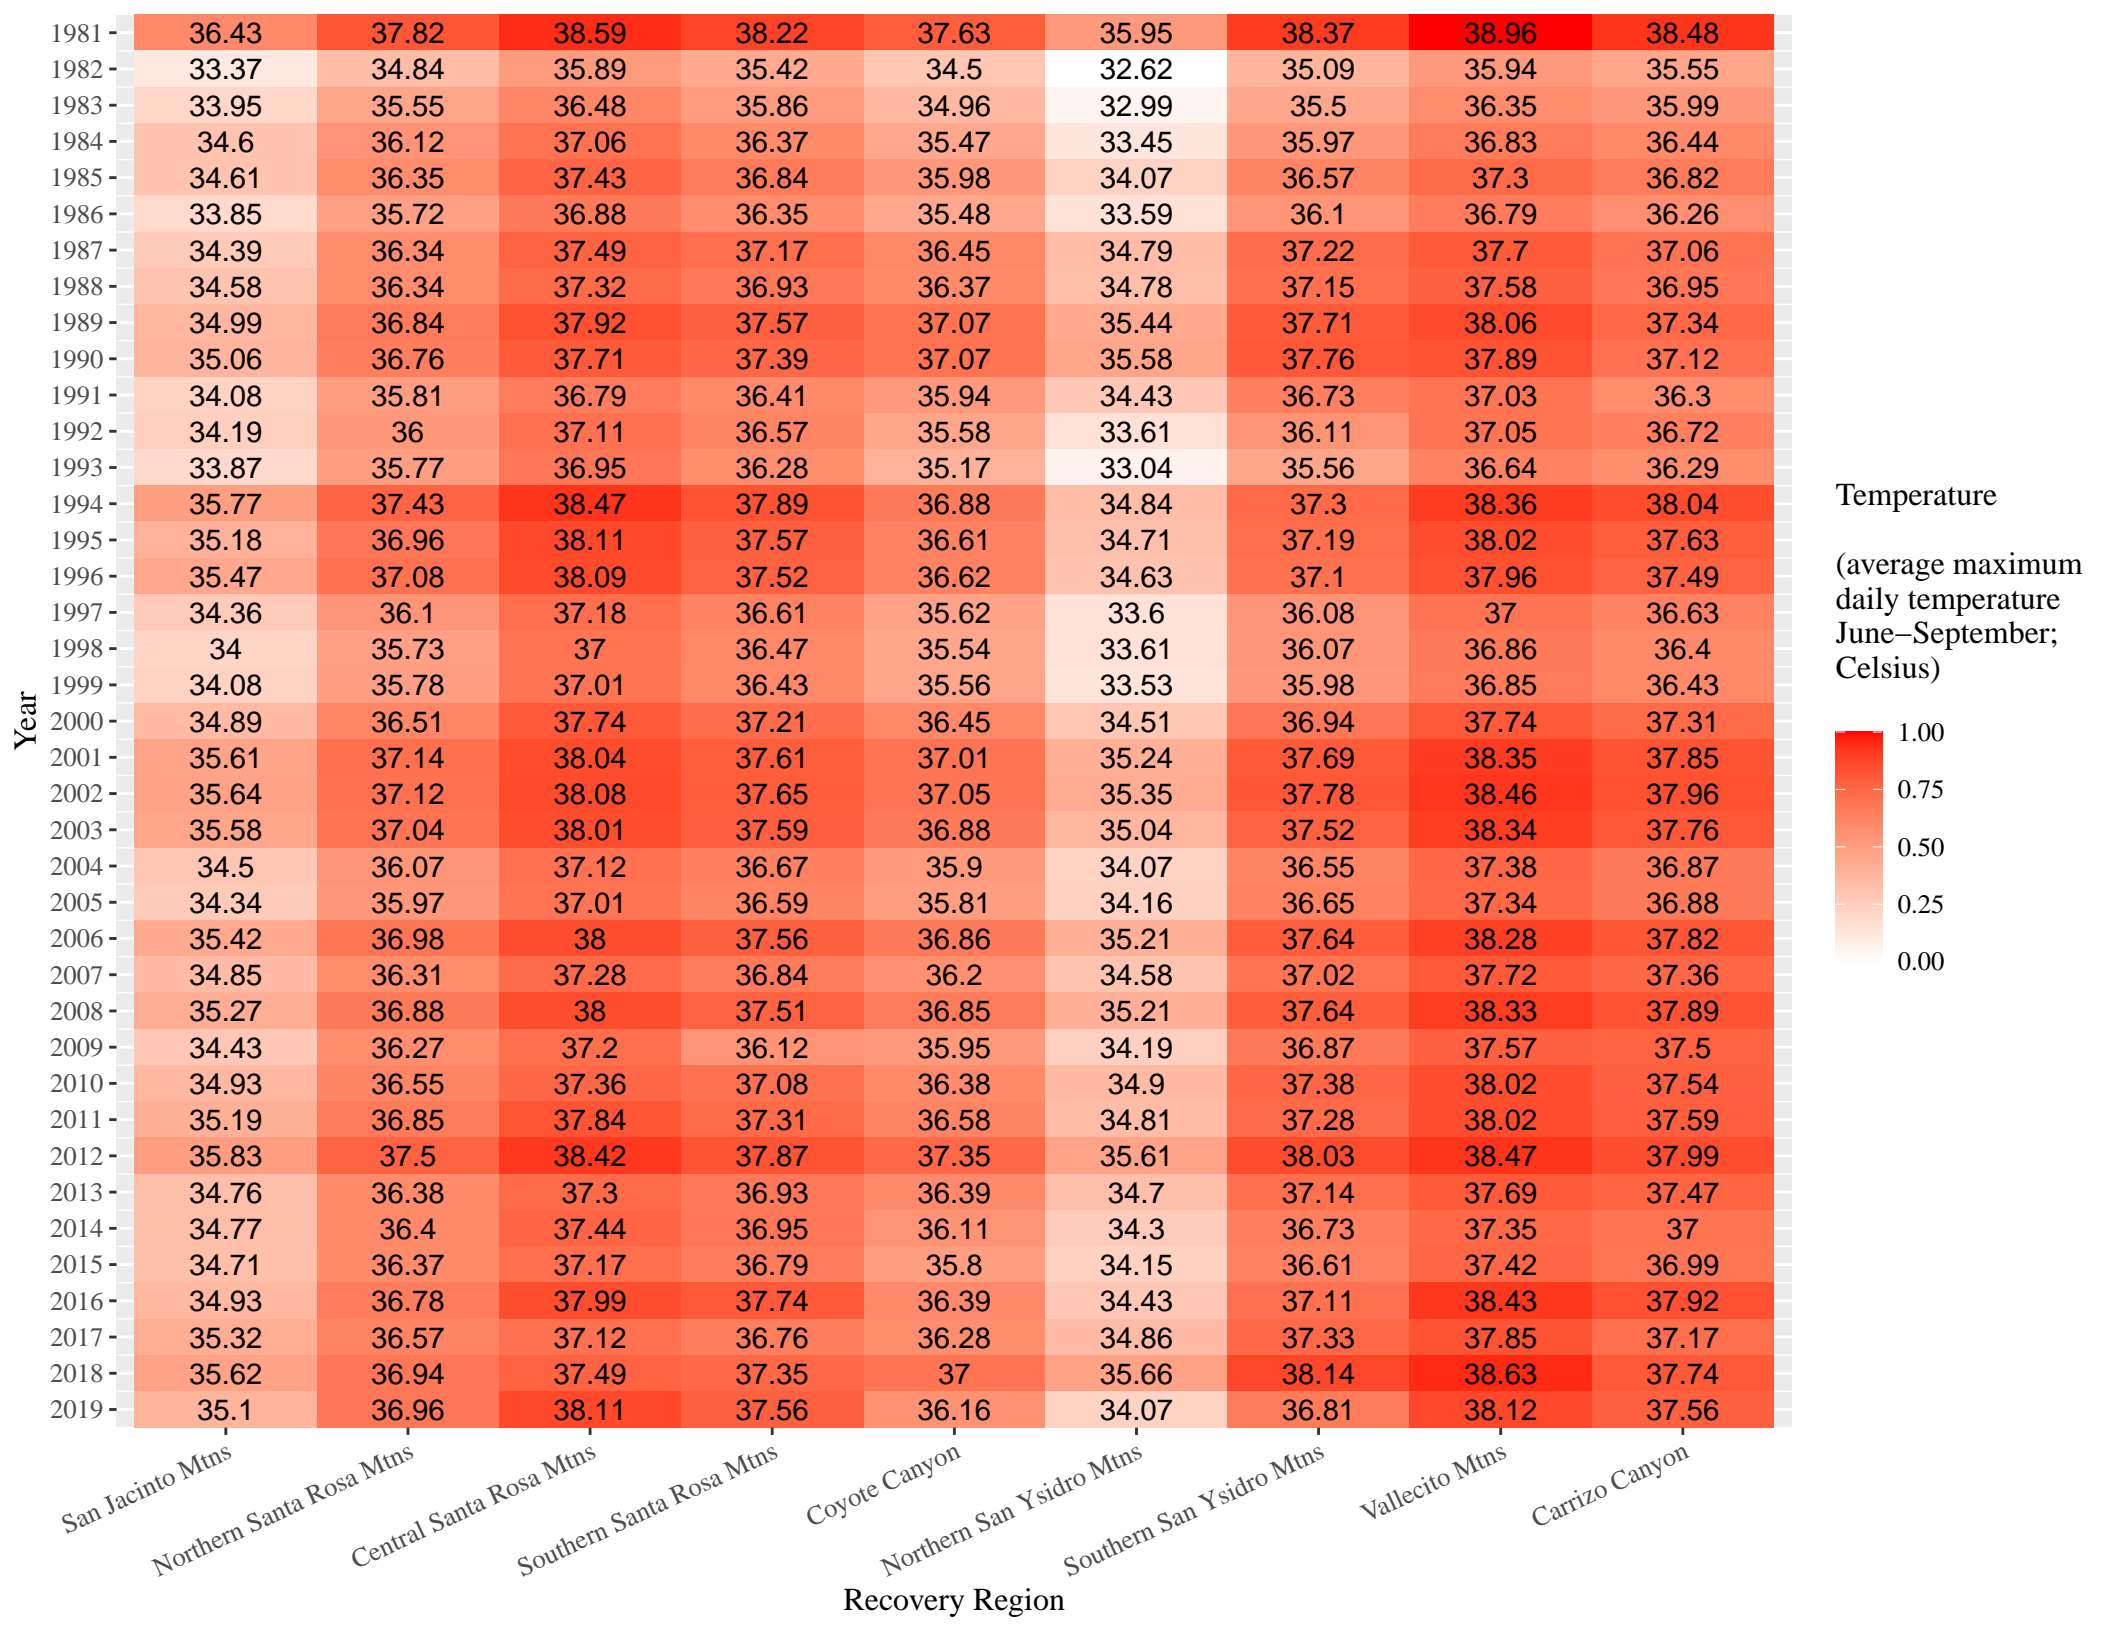

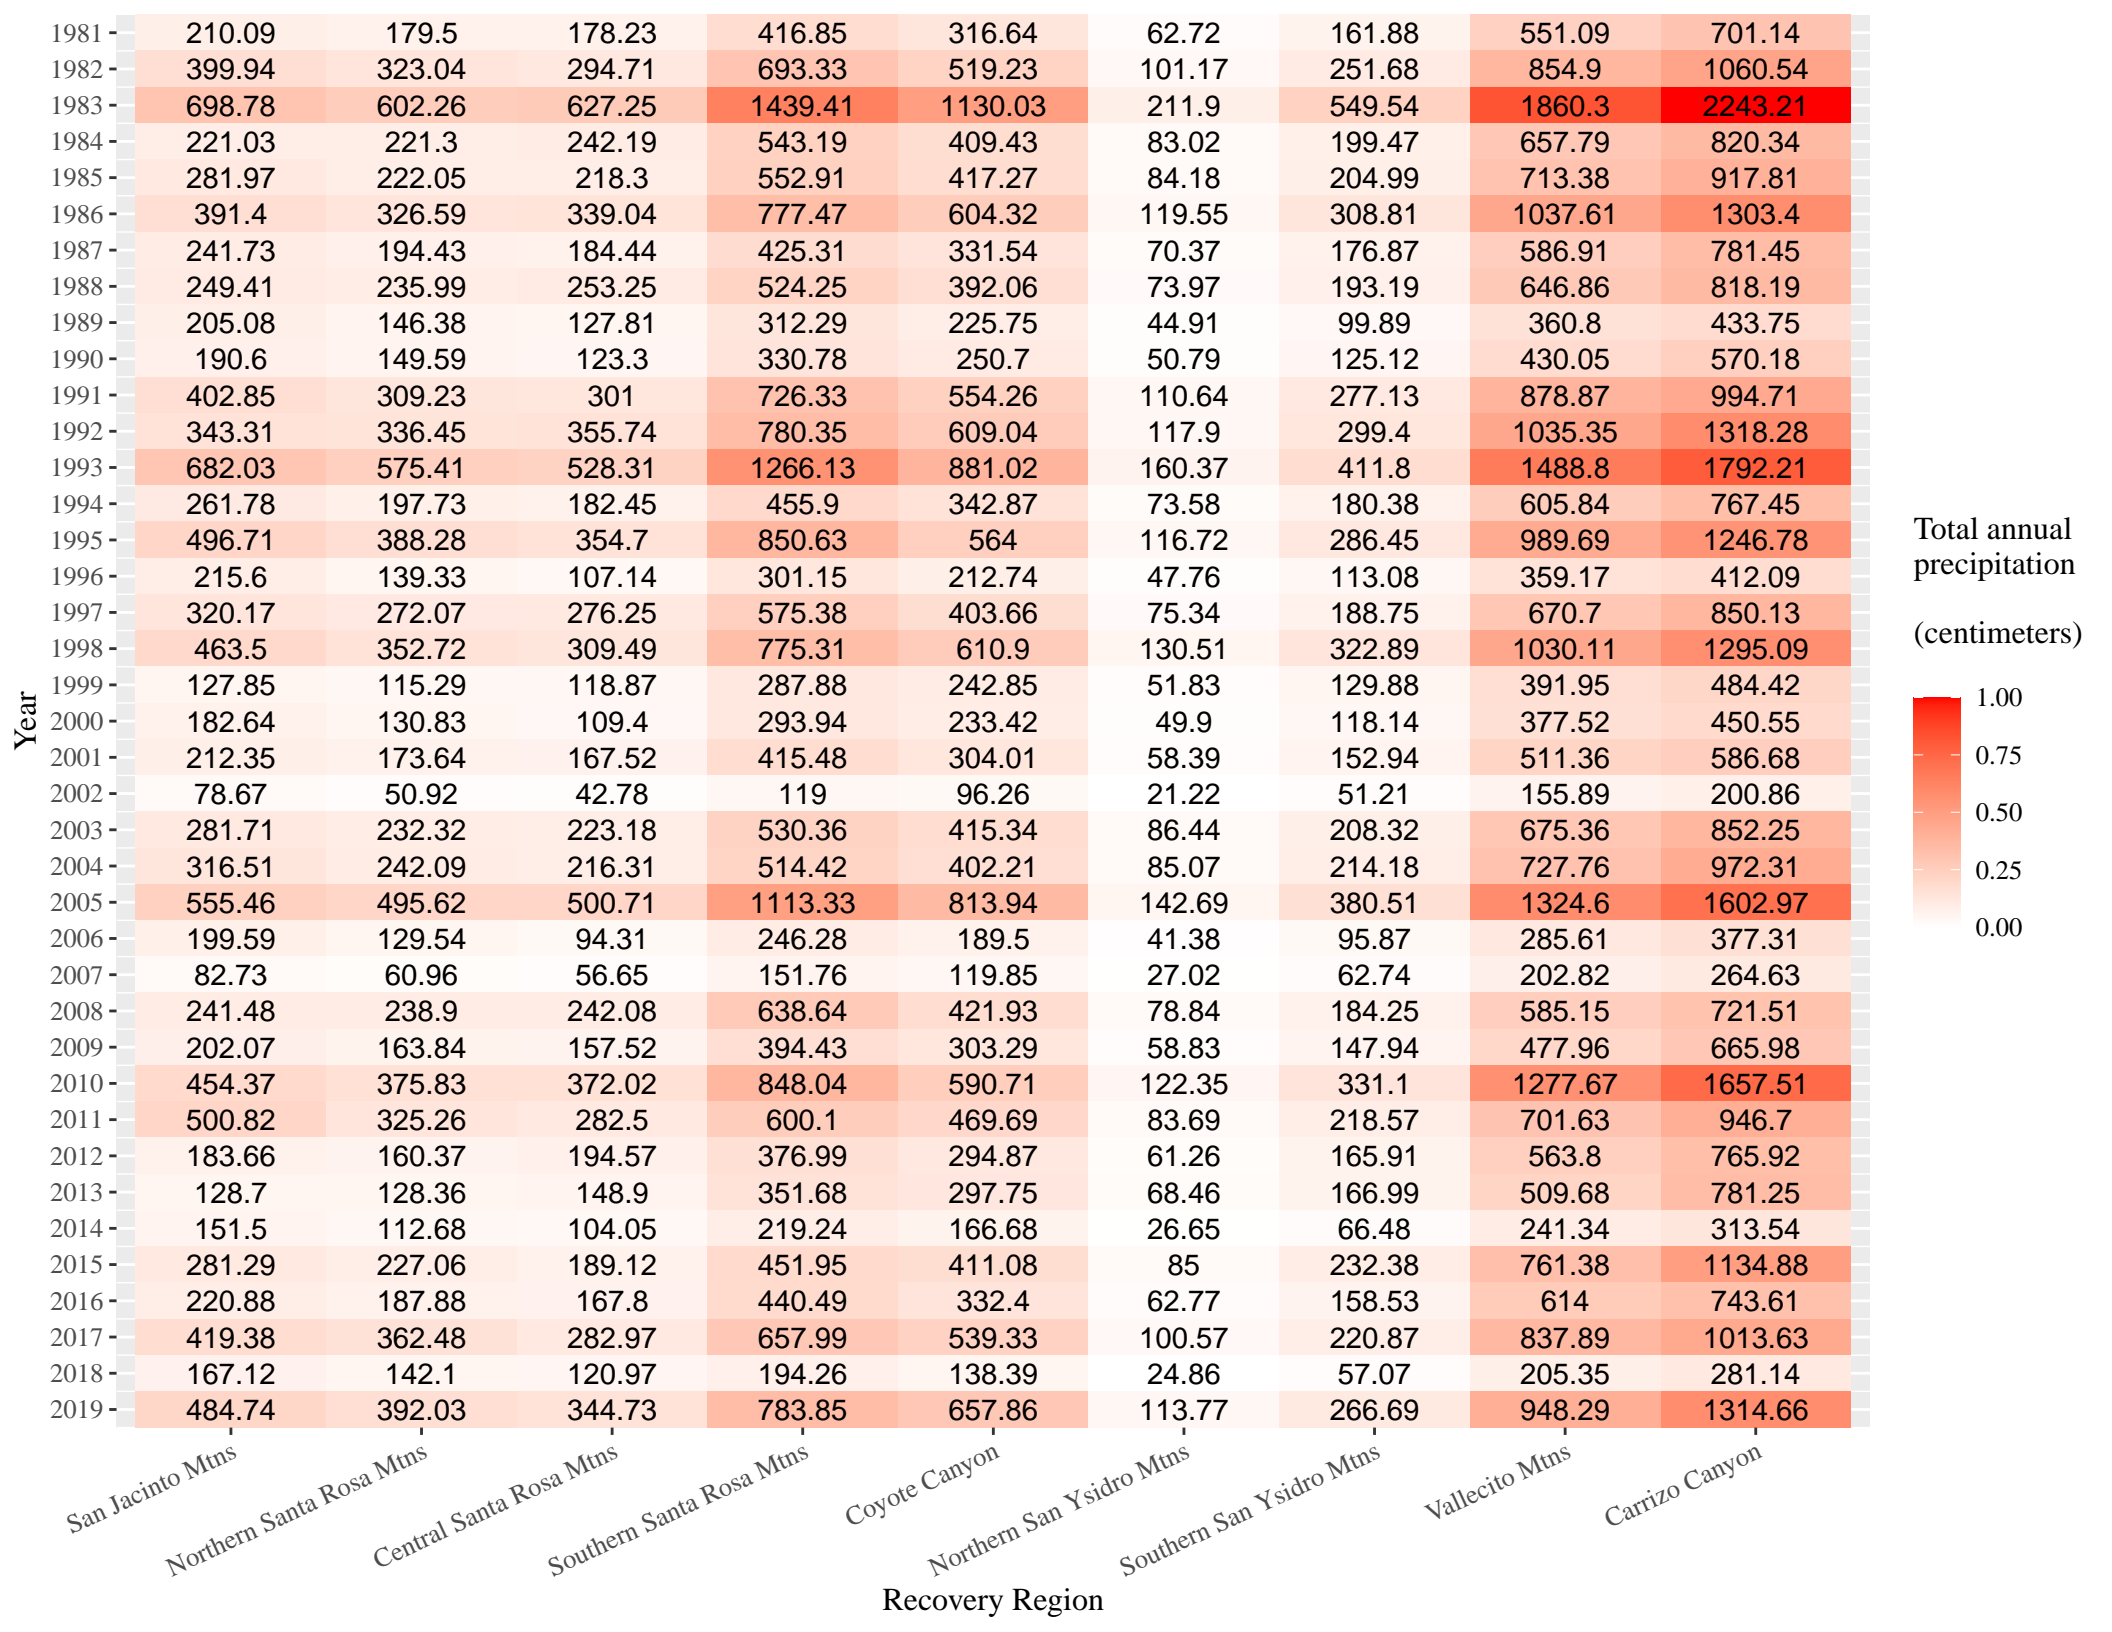

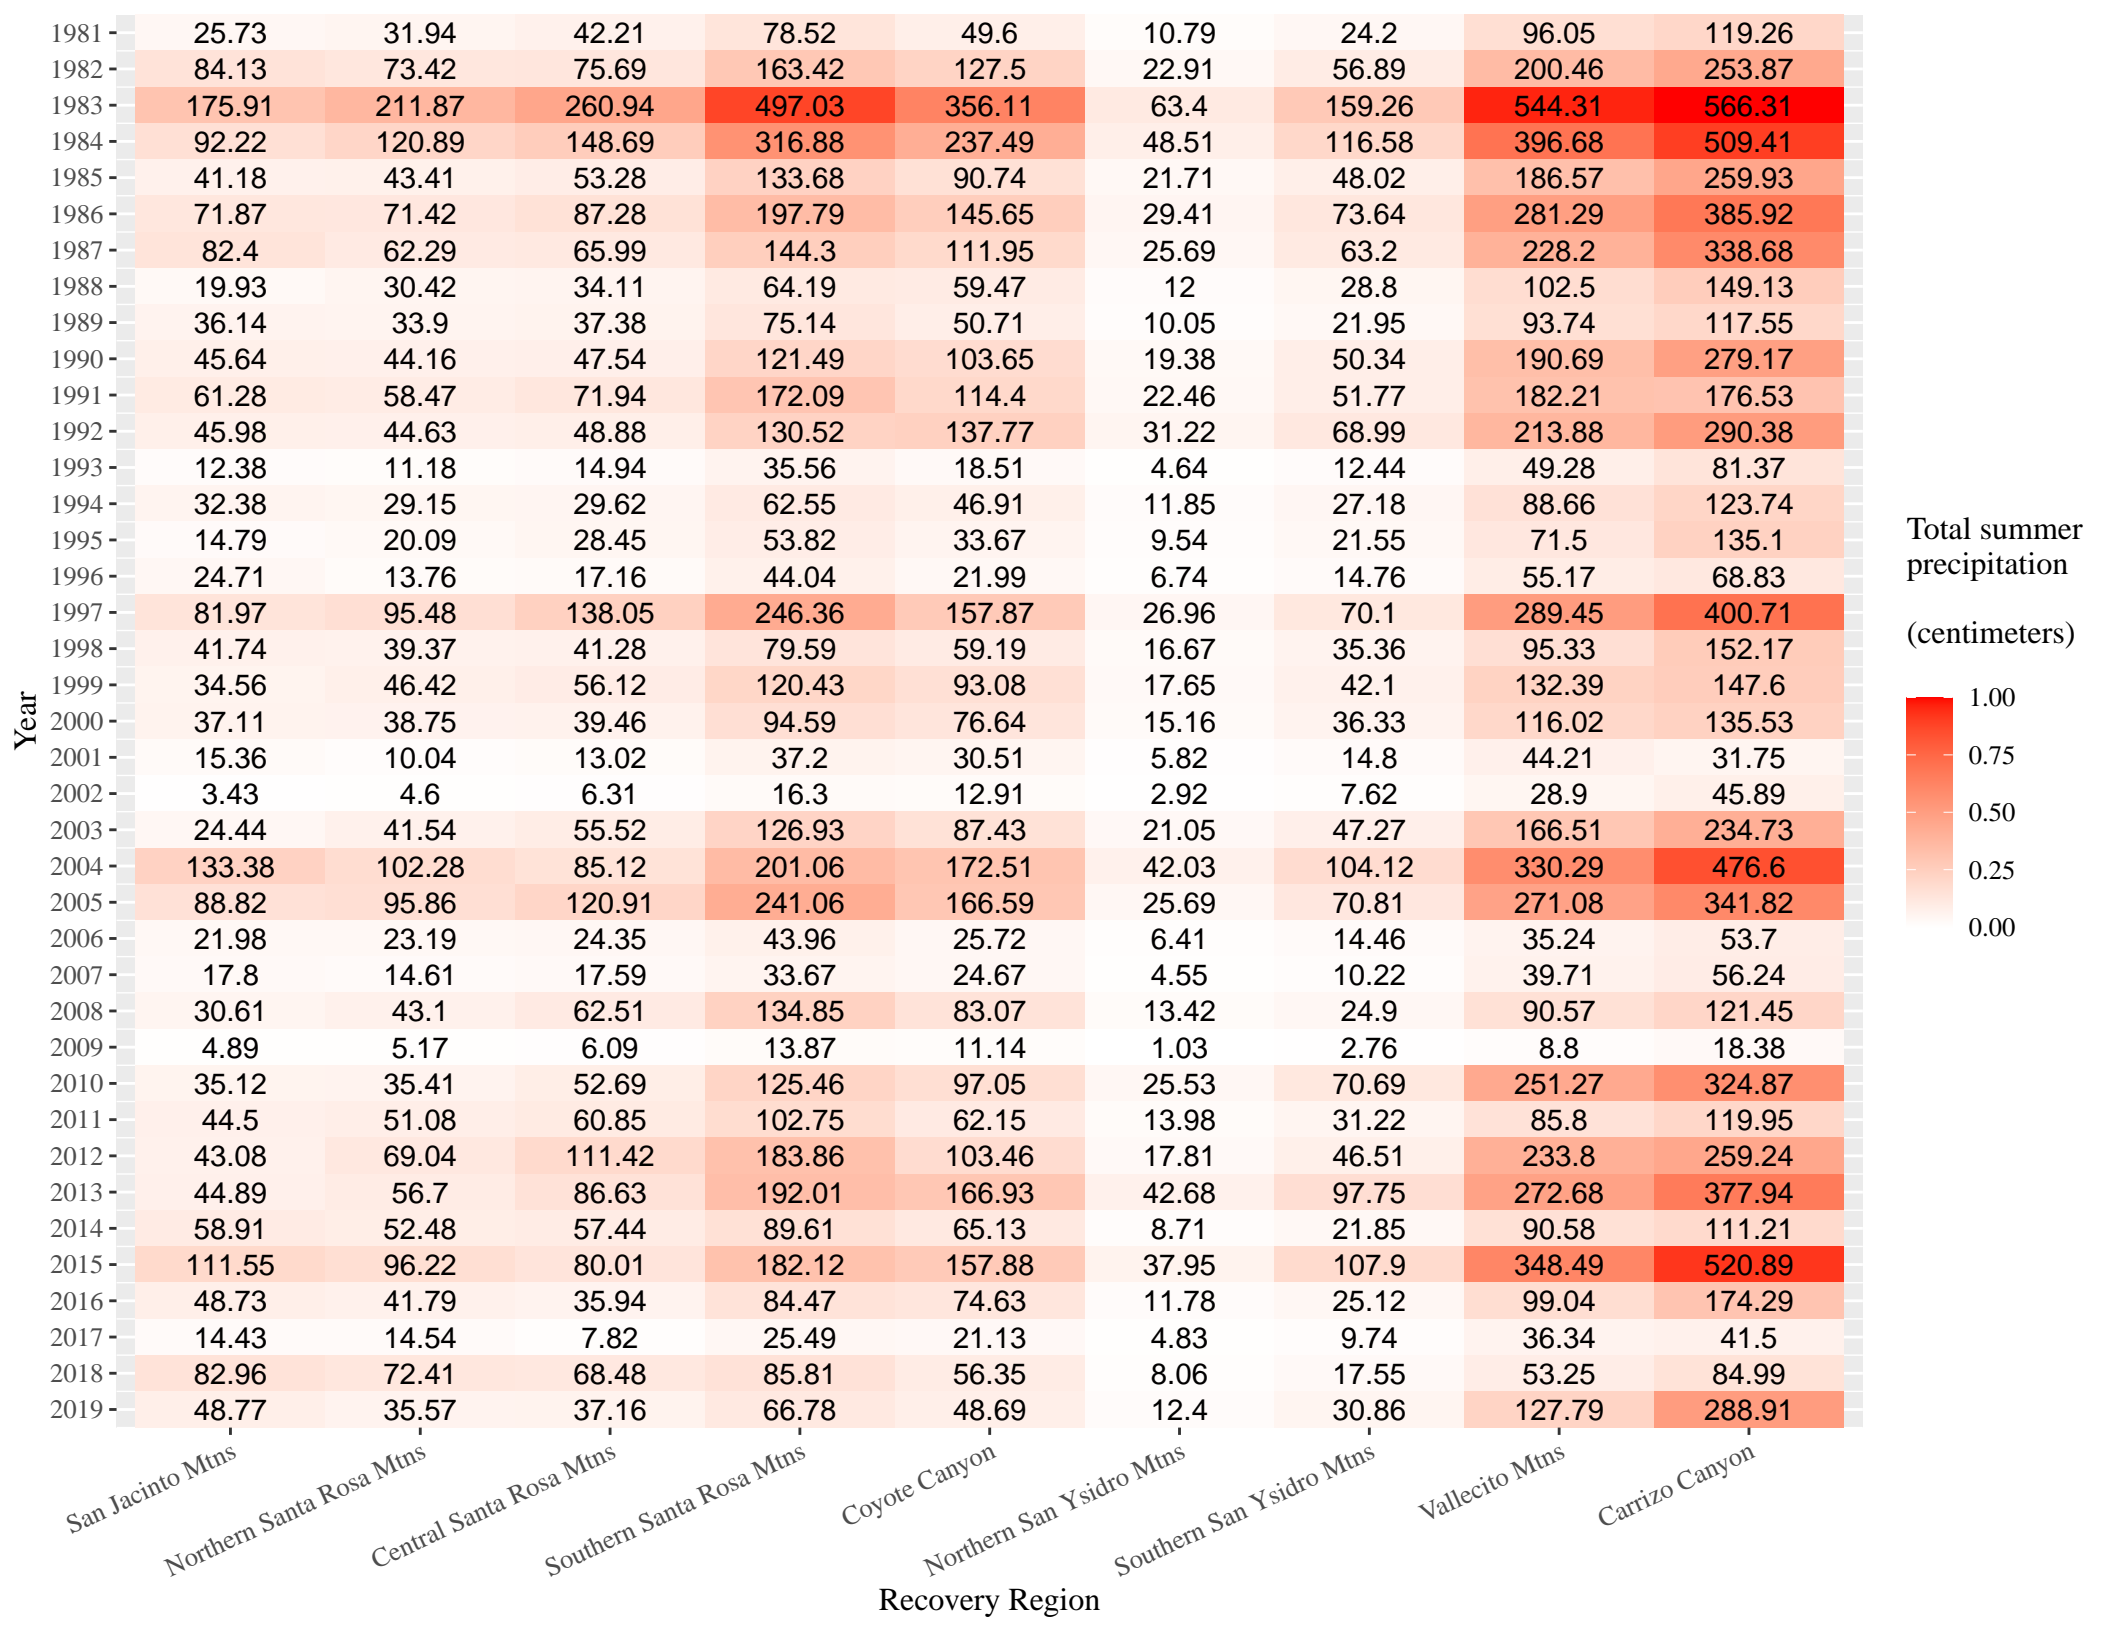



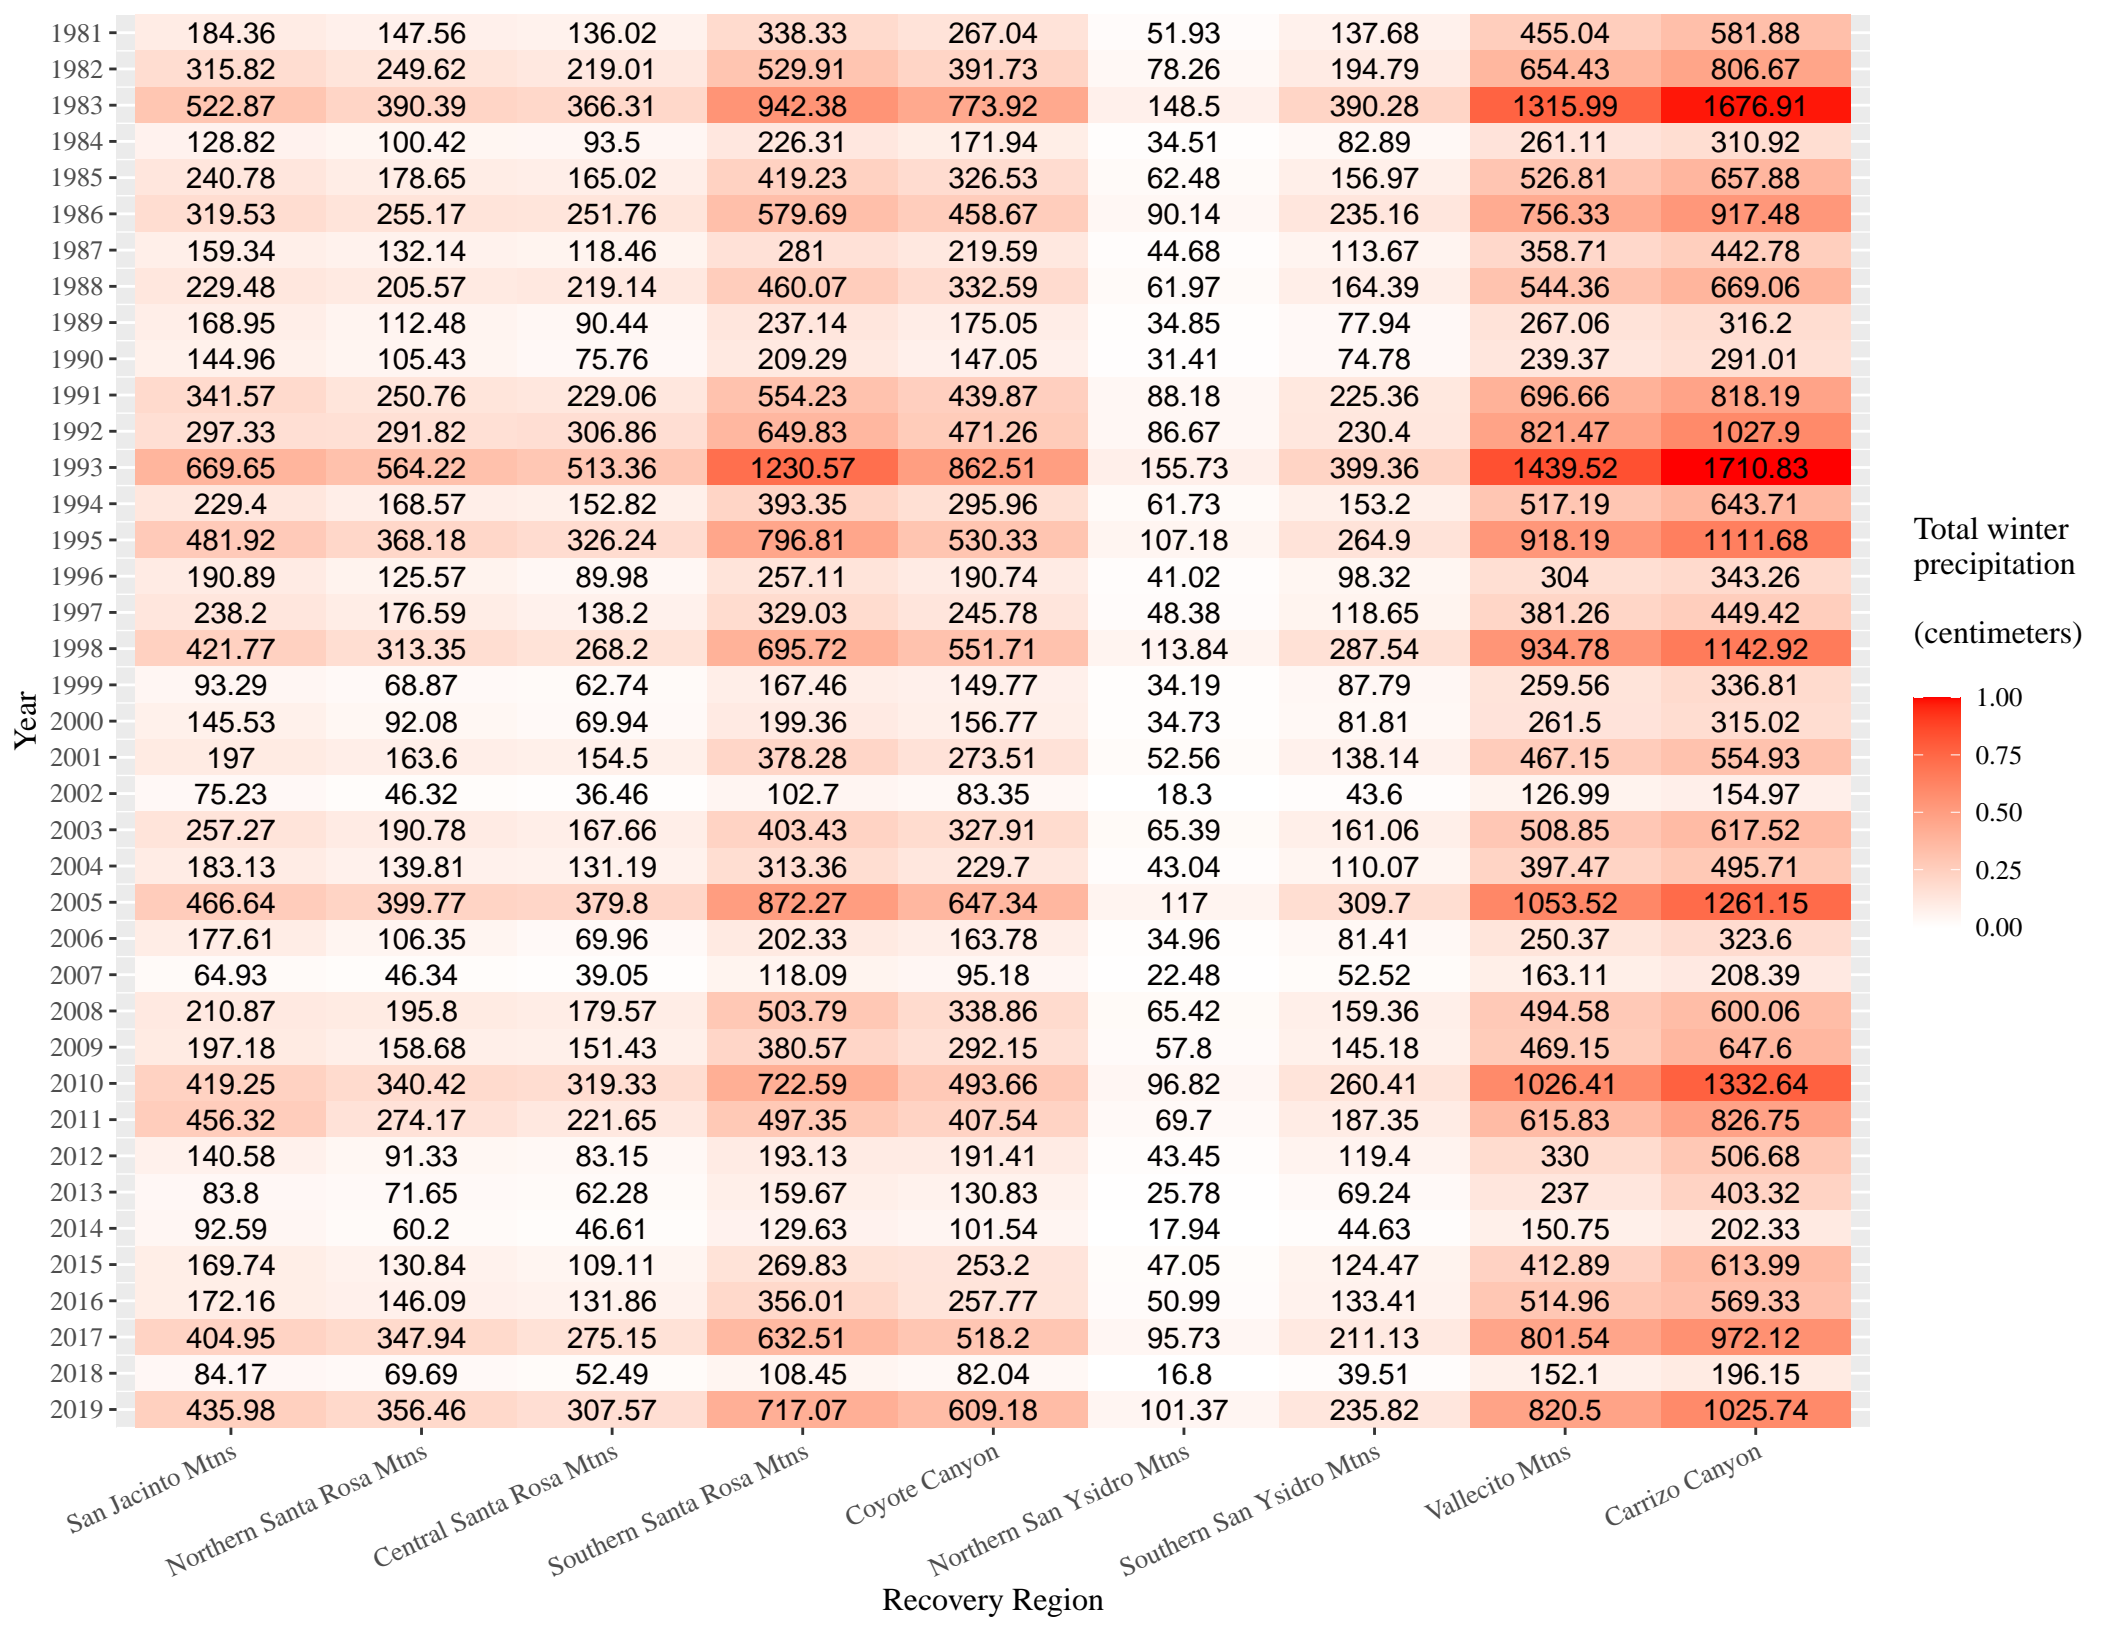

























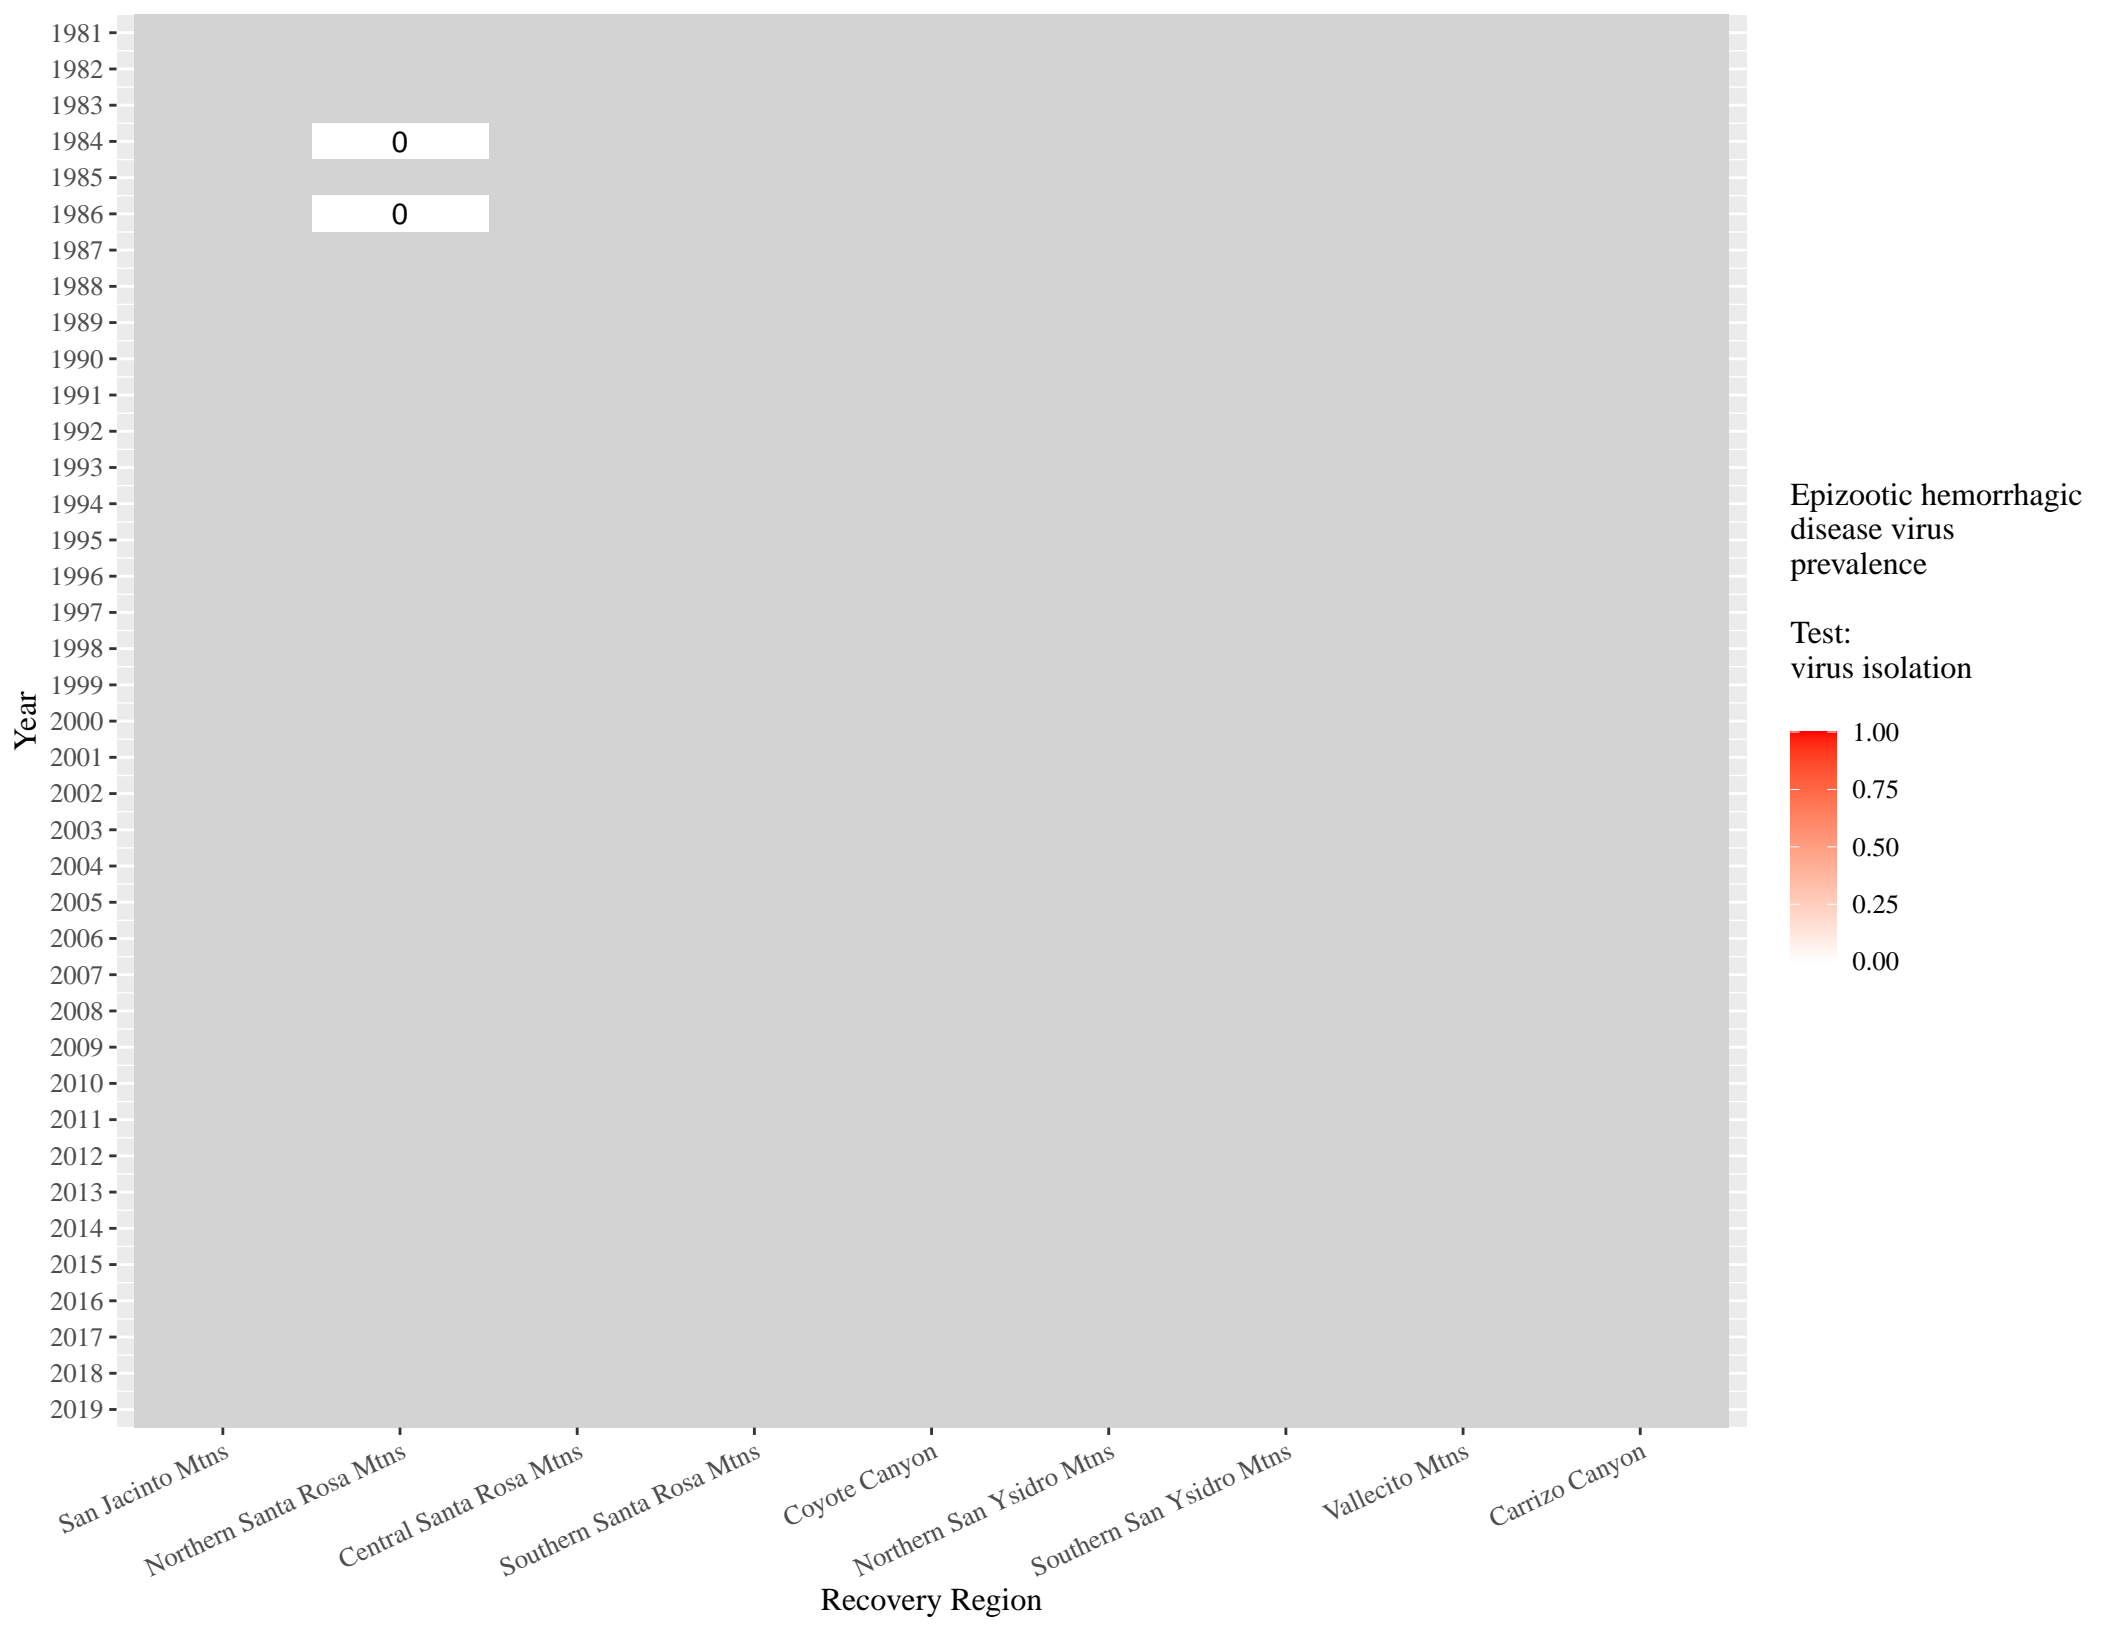

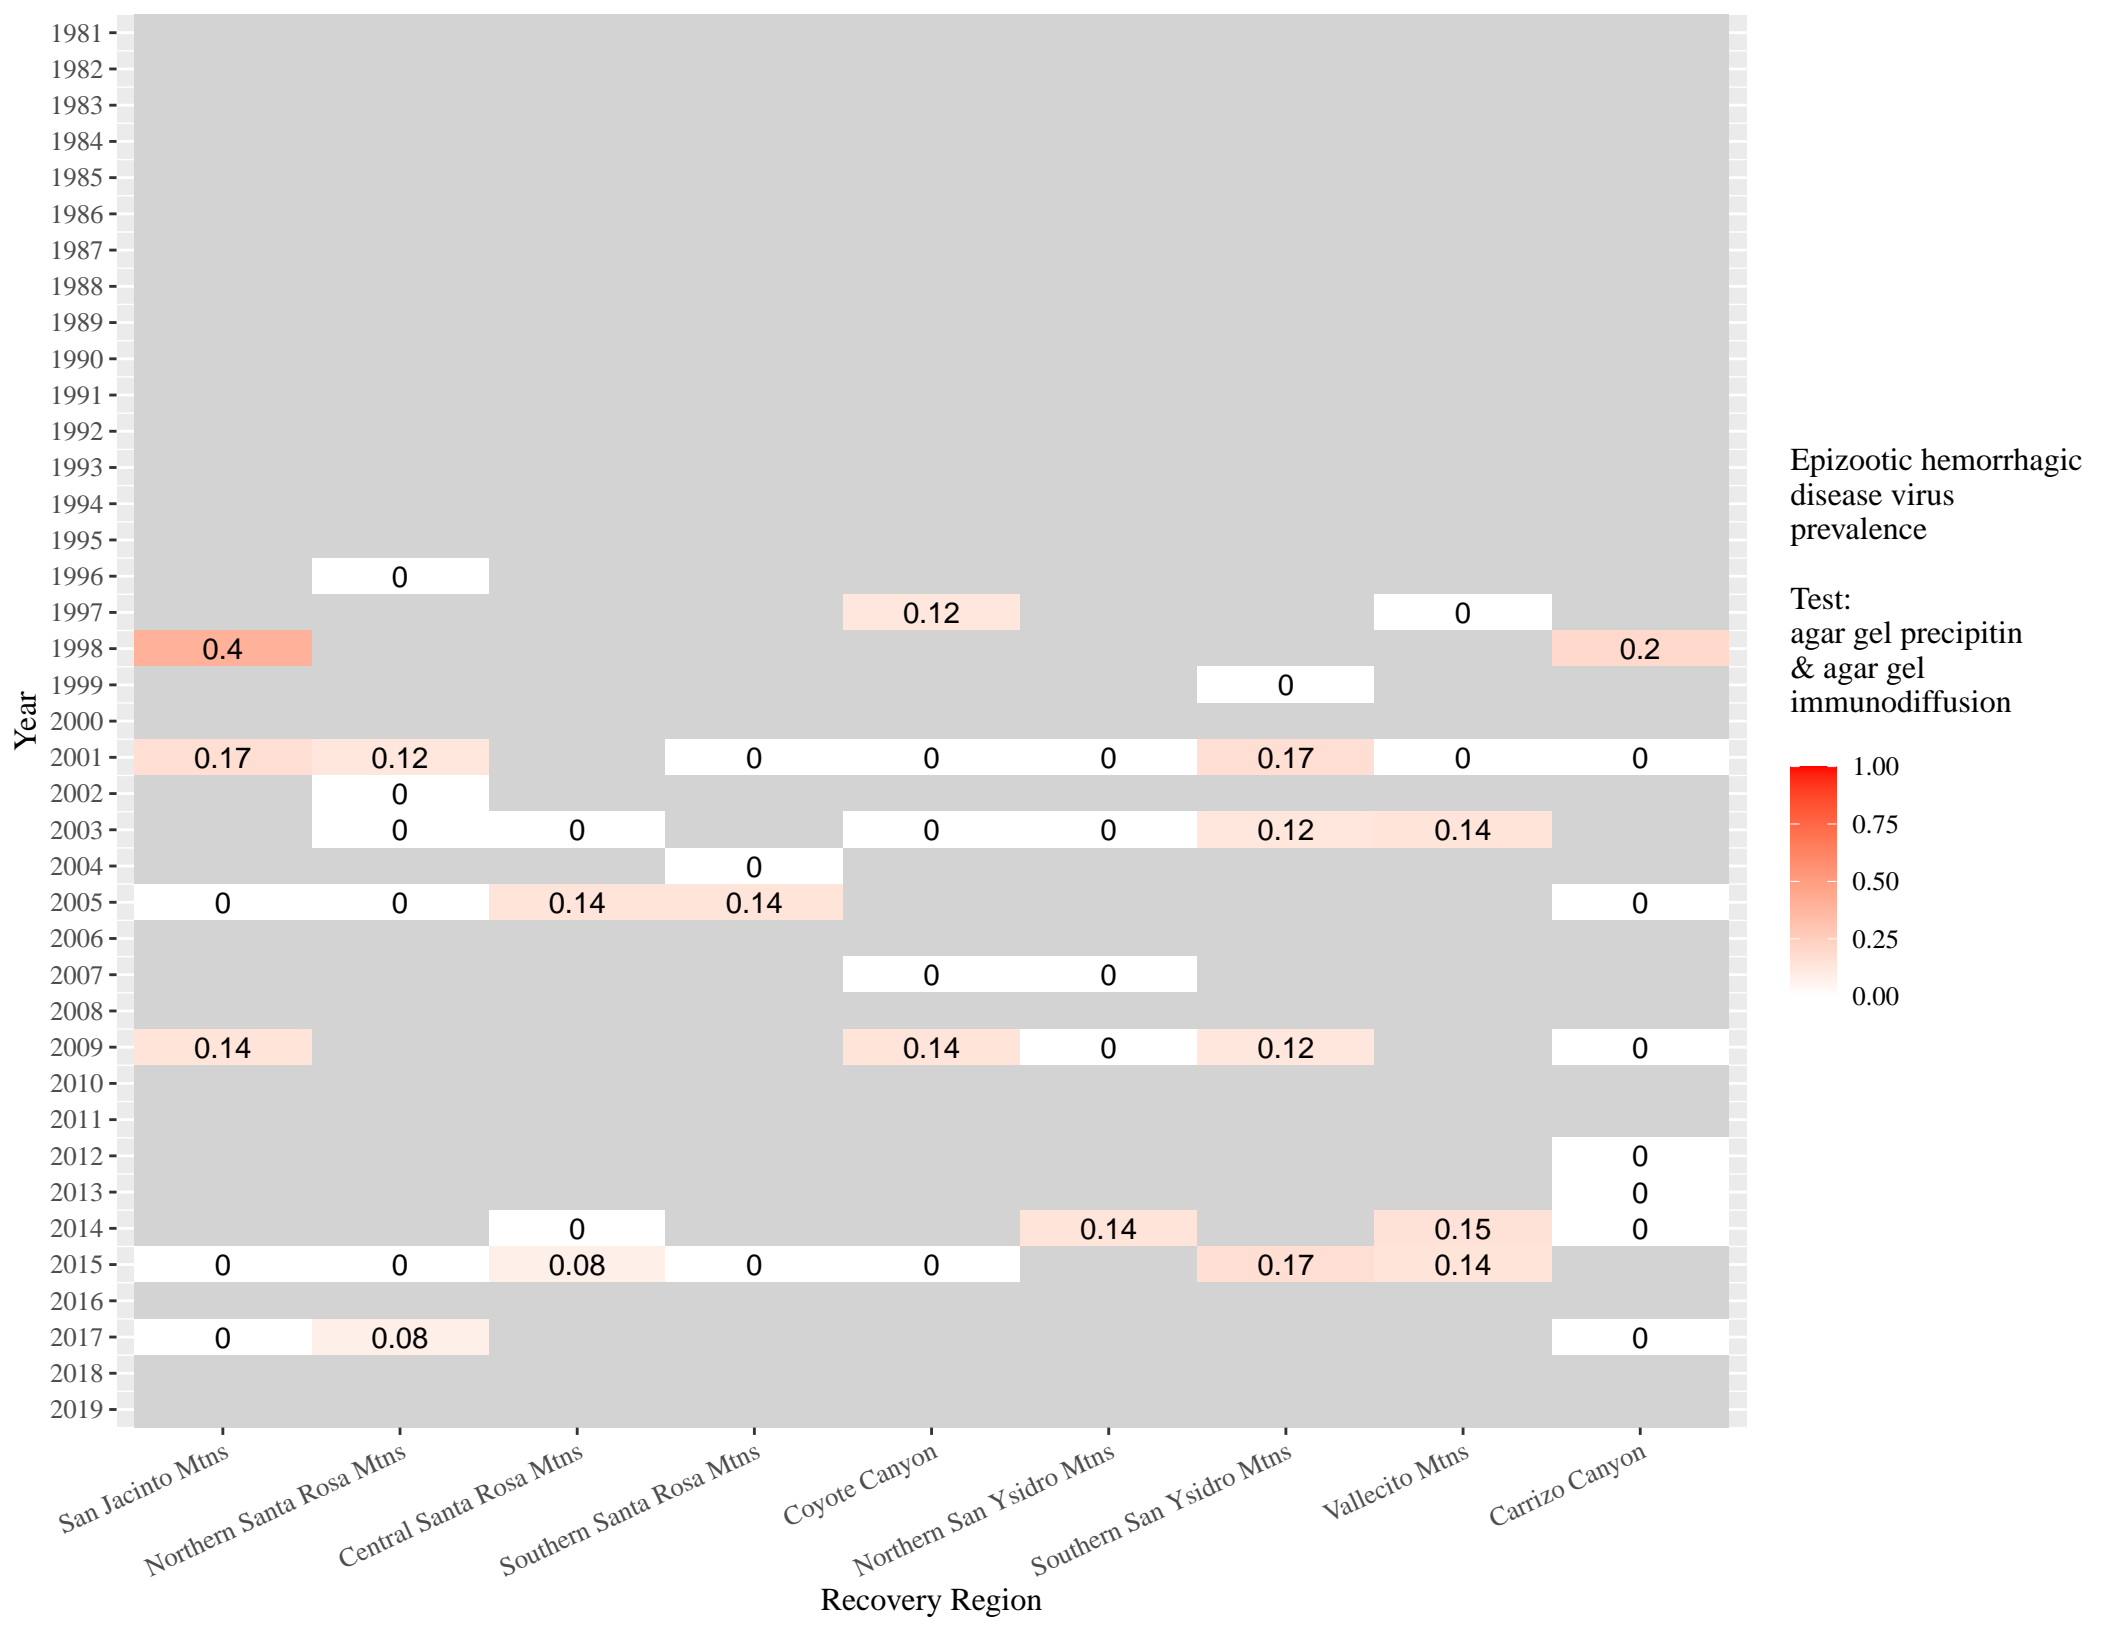

Supplement: NIHMS1836847-supplement-AppendixS1.pdf [file NIHMS1836847-supplement-AppendixS1.pdf]
